# Supplementary material for: A theory-based analysis of the implementation of online asynchronous telemedicine platforms into primary care practices using Normalisation Process Theory
Source: PubMed Central journal article supplement (PMC11800456; doi:10.1186/s12875-025-02717-0), 2025-02-06
Supplement: 12875_2025_2717_MOESM2_ESM.pdf [file 12875_2025_2717_MOESM2_ESM.pdf]

**Study title:**

A theory-based analysis of the implementation of online asynchronous telemedicine platforms into primary care practices using Normalisation Process Theory

**Corresponding author:**

Cara Leighton, BSc - Medical Student, Cardiff University School of Medicine, [leightonch@cardiff.ac.uk](mailto:leightonch@cardiff.ac.uk)  
ORCID: 0009-0002-3881-0298

**Appendix 2 – Excluded studies and reasons for exclusion**

| <b>Author and year</b>  | <b>Journal</b>                                                    | <b>DOI</b>                    | <b>Reason for exclusion</b>                                |
|-------------------------|-------------------------------------------------------------------|-------------------------------|------------------------------------------------------------|
| Atherton et al. 2018    | British Journal of General Practice                               | 10.3399/bjgp18X694853         | Not specific to online asynchronous telemedicine platforms |
| Baron-Miras et al. 2022 | International Journal of Environmental Research and Public Health | 10.3390/ijerph192114119       | Not specific to online asynchronous telemedicine platforms |
| Baughman et al. 2022    | Obesity Science and Practice                                      | 10.1002/osp4.625              | Not specific to online asynchronous telemedicine platforms |
| Benson et al. 2021      | Postgraduate Medicine                                             | 10.1080/00325481.2021.1934492 | Not specific to online asynchronous telemedicine platforms |
| Bliss et al. 2022       | Journal of primary care and community health                      | 10.1177/21501319221114831     | Not specific to online asynchronous telemedicine platforms |
| Bruns et al. 2022       | Journal of pharmacy practice                                      | 10.1177/08971900221136629     | Not specific to online asynchronous telemedicine platforms |
| Carrier et al. 2022     | International Journal of Environmental Research and Public Health | 10.3390/ijerph19106220        | Not specific to online asynchronous telemedicine platforms |
| Chavez et al. 2022      | Journal of the American Board of Family Medicine                  | 10.3122/jabfm.2022.03.210520  | Not specific to online asynchronous telemedicine platforms |
| Chen et al. 2022        | PLoS ONE                                                          | 10.1371/journal.pone.0272605  | Not specific to online asynchronous telemedicine platforms |
| Coffman et al. 2016     | Journal of the American Board of Family Medicine                  | 10.3122/jabfm.2016.04.150375  | Not specific to online asynchronous telemedicine platforms |
| Darley et al. 2022      | medRxiv                                                           | 10.1101/2022.02.21.22271185   | Not specific to online asynchronous telemedicine platforms |
| Dash et al. 2016        | BMC Health Services Research                                      | 10.1186/s12913-016-1776-9     | Not specific to online asynchronous telemedicine platforms |
| Dhaliwal et al. 2022    | Journal of the American Association of                            | 10.1097/JXX.0000000000000626  | Not specific to online asynchronous telemedicine platforms |

|                                |                                                  |                                    |                                                            |
|--------------------------------|--------------------------------------------------|------------------------------------|------------------------------------------------------------|
|                                | Nurse Practitioners                              |                                    |                                                            |
| Ekman et al. 2019              | International Journal of Medical Informatics     | 10.1016/j.ijmedinf.2019.04.016     | Not specific to online asynchronous telemedicine platforms |
| Falgarone et al. 2022          | Journal of Medical Internet Research             | 10.2196/33507                      | Not specific to online asynchronous telemedicine platforms |
| Gomez et al. 2021              | Journal of the American Board of Family Medicine | 10.3122/jabfm.2021.S1.200517       | Not specific to online asynchronous telemedicine platforms |
| Hardie et al. 2022             | British Journal of General Practice Open         | 10.3399/BJGPO.2021.0123            | Not specific to online asynchronous telemedicine platforms |
| Hoskin et al. 2021             | Future Healthcare Journal                        | 10.7861/fhj.2021-0023              | Not specific to online asynchronous telemedicine platforms |
| Jonnagaddala et al. 2021       | International Journal of Medical Informatics     | 10.1016/j.ijmedinf.2021.104470     | Not specific to online asynchronous telemedicine platforms |
| Kludacz-Alessandri et al. 2021 | Journal of Clinical Medicine                     | 10.3390/jcm10163502                | Not specific to online asynchronous telemedicine platforms |
| McGrail et al. 2017            | Journal of Medical Internet Research             | 10.2196/jmir.7374                  | Not specific to online asynchronous telemedicine platforms |
| Mold et al. 2015               | British Journal of General Practice              | 10.3399/bjgp15X683941              | Not specific to online asynchronous telemedicine platforms |
| Mold et al. 2019               | JMIR Medical Informatics                         | 10.2196/13042                      | Not specific to online asynchronous telemedicine platforms |
| Neves et al. 2021              | Journal of Telemedicine and Telecare             | 10.1177/1357633X211066235          | Not specific to online asynchronous telemedicine platforms |
| Olayiwola et al. 2020          | JMIR Public Health and Surveillance              | 10.2196/19045                      | Not specific to online asynchronous telemedicine platforms |
| Parker et al. 2021             | British Journal of General Practice Open         | 10.3399/BJGPO.2021.0040            | Not specific to online asynchronous telemedicine platforms |
| Quinlan et al. 2018            | Irish Medical Journal                            |                                    | Not specific to online asynchronous telemedicine platforms |
| Rosen et al. 2022              | British Journal of General Practice Open         | 10.3399/BJGPO.2021.0204            | Not specific to online asynchronous telemedicine platforms |
| Alexander et al. 2020          | JAMA Network Open                                | 10.1001/jamanetworkopen.2020.21476 | Not specific to general practice                           |
| Chan et al. 2018               | Journal of general internal medicine             | 10.1007/s11606-018-4637-x          | Not specific to general practice                           |
| Erdmann et al. 2022            | JAMA Network Open                                | 10.1001/jamanetworkopen.2022.0348  | Not specific to general practice                           |
| Jetty et al. 2021              | Journal of the American Board of Family Medicine | 10.3122/jabfm.2021.S1.200202       | Not specific to general practice                           |
| Nguyen et al. 2021             | Journal of Medical Internet Research             | 10.2196/27531                      | Not specific to general practice                           |
| Rastogi et al. 2020            | Journal of general internal medicine             | 10.1007/s11606-019-05415-7         | Not specific to general practice                           |

|                          |                                                                   |                                    |                                              |
|--------------------------|-------------------------------------------------------------------|------------------------------------|----------------------------------------------|
| Shimada et al. 2017      | Journal of the American Medical Informatics Association           | 10.1093/jamia/ocx021               | Not specific to general practice             |
| Uscher-Pines et al. 2020 | Journal of Medical Internet Research                              | 10.2196/22727                      | Not specific to general practice             |
| Waschkau et al. 2022     | International Journal of Environmental Research and Public Health | 10.3390/ijerph192214860            | Not specific to general practice             |
| Yakushi et al. 2020      | Permanente Journal                                                | 10.7812/TPP/19.177                 | Not specific to general practice             |
| Bavafa et al. 2018       | Management Science                                                | 10.1287/mnsc.2017.2900             | Pre-2015 data                                |
| Bertelsen et al. 2015    | Studies in health technology and informatics                      | 10.3233/978-1-61499-564-7-376      | Pre-2015 data                                |
| Huygens et al. 2018      | British Medical Journal Open                                      | 10.1136/bmjopen-2017-019233        | Pre-2015 data                                |
| Riippa et al. 2015       | Journal of Medical Internet Research                              | 10.2196/jmir.4487                  | Pre-2015 data                                |
| Baldwin et al. 2017      | Journal of the American Board of Family Medicine                  | 10.3122/jabfm.2017.05.170088       | No interaction between clinician and patient |
| Balestrieri et al. 2020  | Family Medicine                                                   | 10.1093/fampra/cmaa077             | No interaction between clinician and patient |
| Eccles et al. 2019       | British Journal of General Practice                               | 10.3399/bjgp19X702197              | No interaction between clinician and patient |
| Mehta et al. 2019        | Journal of general internal medicine                              | 10.1007/s11606-019-05241-x         | No interaction between clinician and patient |
| Anderson et al. 2017     | The Annals of Family Medicine                                     | 10.1370/afm.2036                   | Patient/clinician satisfaction               |
| Fagerlund et al. 2019    | British Medical Journal Open                                      | 10.1136/bmjopen-2018-028251        | Patient/clinician satisfaction               |
| Baines et al. 2020       | Journal of Medical Internet Research                              | 10.2196/19375                      | No relevant outcomes                         |
| Segui et al. 2021        | Journal of Medical Internet Research                              | 10.2196/29622                      | No relevant outcomes                         |
| Zhong et al. 2018        | Health Care Management Science                                    | 10.1007/s10729-017-9404-8          | No relevant outcomes                         |
| De Moraes et al. 2022    | BMC Research Notes                                                | 10.1186/s13104-022-06197-8         | Not applicable to NHS                        |
| Peabody et al. 2019      | Journal of the American Board of Family Medicine                  | 10.3122/jabfm.2019.06.190081       | Not applicable to NHS                        |
| Join et al. 2020         | Journal of the American Medical Association Network Open          | 10.1001/jamanetworkopen.2020.28392 | Not a research article                       |
| Roig Cabo et al. 2021    | Atencion Primaria                                                 | 10.1016/j.aprim.2021.102070        | Not in English                               |
| Barton et al. 2018       | Telemedicine and e-Health                                         | 10.1089/tmj.2017.0184              | Not retrieved                                |
| Kim et al. 2015          | American Journal of Managed Care                                  |                                    | Not retrieved                                |
| Motz et al. 2020         | South Dakota Medicine: The Journal of the South Dakota            |                                    | Not retrieved                                |

|                       |                                      |                            |                                           |
|-----------------------|--------------------------------------|----------------------------|-------------------------------------------|
|                       | State Medical Association            |                            |                                           |
| Murray et al. 2020    | Telemedicine and e-Health            | 10.1089/tmj.2019.0044      | Not retrieved                             |
| Penza et al. 2021     | Telemedicine and e-Health            | 10.1089/tmj.2020.0047      | Not retrieved                             |
| Terekhova et al. 2017 | British Columbia Medical Journal     |                            | Not retrieved                             |
| Peeters et al. 2016*  | Journal of Medical Internet Research | 10.2196/medinform.4515     | Pre-2015 data                             |
| Player et al. 2018*   | Health Affairs                       | 10.1377/hlthaff.2018.05122 | Not specific to general practice          |
| Schers et al. 2021*   | Annals of Family Medicine            | 10.1370/afm.2625           | Not specific to asynchronous telemedicine |

\*Retrieved through citation searching
